# Supplementary material for: Association between androgen receptor gene alteration and osteoporosis in Chinese Han elderly men
Source: PeerJ. 2023 Feb 13;11:e14782. doi: 10.7717/peerj.14782 (PMC9933766; doi:10.7717/peerj.14782)
Supplement: Supplemental Information 1 [file peerj-11-14782-s001.xlsx]

## Sheet: control group
Number	Age	Height	Weight	BMI	Average blood glucose	Glycosylated hemoglobin	Total cholestero	Triglyceride	High-density lipoprotein	Low-density lipoprotein	Calcium	Phosphorus	Alkaline phosphatase	Number of repetition	Genotypes	BMD(L1)	BMD(L2)	BMD(L3)	BMD(L4)	BMD（Neck of femur）	BMD（wards triangle）	BMD（Greater trochanter of femur）	T-score(L1)	T-score(L2)	T-score(L3)	T-score(L4)	T-score（Neck of femur）	T-score（wards triangle）	T-score（Greater trochanter of femur）
A10	65	165	57	20.94	12.45	9.76	4.01	1.36	0.72	1.58	2.16	1.13	98.41	23	LL	0.886	1.124	1.039	1.111	1.05	0.83	0.943	-1.1	0.3	-0.1	0.2	0.6	-0.3	1
A33	65	157	60	24.34	4.71	5.05	5.09	0.81	0.78	1.69	2.27	0.92	100.29	18	SS	1.036	0.852	0.993	1.056	0.712	0.488	0.705	0.2	-2	-1	-0.3	-2	-2.4	-1
A7	67	165	82	30.12	8.94	8.06	3.91	1.34	0.77	1.45	2.25	0.93	95.03	19	SS	1.02	1.09	1.22	1.22	0.72	0.48	0.71	0.79	0.85	1.15	0.77	-1.13	-2.02	-0.53
A32	67	165	58	21.3	4.94	3.28	3.71	1.37	0.71	1.36	2.38	1.04	93.74	25	LL	0.819	0.915	0.998	0.939	0.719	0.477	0.718	-1.6	-1.4	-0.9	-1.3	-2	-2.3	-0.9
A4	68	150	55	24.44	4.77	2.41	3.05	0.89	0.77	1.29	1.96	1.12	102.06	19	SS	0.905	0.828	0.977	0.994	0.92	0.913	0.896	-0.9	-2.2	-1.1	-0.8	-0.4	0.2	0.6
A17	70	171	72	24.62	6.19	6.52	5.41	0.87	0.86	1.26	2.27	1.13	100.39	14	SS	0.832	1.144	1.076	0.93	0.835	0.679	0.742	-1.5	0.5	-0.3	-1.3	-1.1	-1.3	-0.7
A34	70	154	55	23.19	8.24	6.97	3.17	0.97	0.56	1.31	2.32	1.13	89.33	18	SS	0.897	0.946	1.144	1.204	0.851	0.795	0.83	-1	-1.2	0.3	0.9	-1	-0.6	0
A15	71	155	73	30.39	6.81	5.8	2.77	0.75	0.72	1.25	2.52	1.15	103.28	22	SS	0.795	0.888	1.06	1.071	0.735	0.579	0.765	-1.8	-1.7	-0.4	-0.2	-1.9	-2	-0.6
A16	71	160	60	23.44	5.57	5.16	3.86	0.8	0.78	1.66	2.32	1.09	87.42	22	SS	1.033	1.137	1.25	1.237	0.929	0.745	0.74	0.1	0.4	1.2	1.2	-0.4	-0.9	-0.7
A35	71	170	76	26.3	11.01	8.34	3.92	1.16	0.49	1.45	2.07	1.13	108.7	23	LL	0.738	0.943	1.003	0.953	0.96	0.706	0.83	-2.3	-1.2	-0.9	-1.1	-0.1	-1.2	0
A40	71	154	67	28.25	10.07	7.21	3.54	0.81	0.88	1.64	2.11	1.27	101.57	20	SS	0.873	0.883	0.942	0.929	0.912	1.034	1.166	-1.2	-1.7	-1.4	-1.3	-0.5	1	2.8
A20	72	175	70	22.86	3.56	5.07	3.46	0.92	0.55	1.7	2.45	1.15	93.77	17	SS	1.011	1.117	1.278	1.032	0.812	1.03	0.842	0	0.2	1.4	-0.5	-1.3	1	0.1
A28	72	160	55	21.48	5.5	3.73	3.66	0.57	0.73	1.69	2.06	0.97	95.38	22	SS	0.989	0.895	0.836	0.94	0.826	0.821	0.842	-0.2	-1.6	-2.3	-1.3	-1.2	-0.4	0.1
A29	72	171	65	22.23	7.9	5.62	3.81	1.09	0.84	1.3	2.28	0.99	92.2	19	SS	0.901	0.802	0.877	0.917	0.817	0.696	0.841	-0.1	-2.4	-1.9	-1.4	-1.2	-1.2	0.1
A38	72	170	65	22.49	5.54	4.45	3.59	0.99	0.92	1.54	2.16	0.92	89.94	20	SS	1.06	1.065	1.172	1.37	1.024	0.774	0.883	-0.2	-0.2	0.5	2.3	0.4	-0.7	0.5
A3	73	165	60	22.04	8.86	7.46	3.76	1.13	0.79	1.68	2.32	1.04	103.9	21	SS	0.958	1.079	1.092	1.189	0.886	0.74	0.833	-0.5	-0.1	-0.1	0.8	-0.7	-0.9	0
A22	73	160	46	17.97	10.1	6.92	3.63	0.83	0.85	1.71	2.34	1.25	97.53	21	SS	1.06	1.054	1.015	1.037	0.953	0.97	0.901	0.4	-0.3	-0.8	-0.4	-0.2	0.6	0.6
A36	73	168	60	21.26	10.34	6.71	5.04	1.37	0.75	1.66	2.44	1.01	101.61	24	LL	0.787	1.289	0.879	0.88	0.929	0.665	0.663	-1.9	1.7	-1.9	-1.7	-0.4	-1.4	-1.6
A2	74	165	61	22.41	10.89	7.45	3.85	1.34	0.73	1.24	2.19	1.17	95.46	21	SS	0.916	0.914	0.999	1.051	0.718	0.544	0.687	-0.8	-1.5	-0.9	-0.3	-2	-2.2	-1.2
A21	74	156	63	25.89	6.5	5.82	4.1	1.21	0.99	1.56	2.02	1.23	97.81	20	SS	0.842	0.863	0.845	0.844	0.715	0.683	0.749	-1.5	-1.9	-2.2	-2.1	-2	-1.3	-0.7
A12	76	167	60	21.51	4.9	5.28	3.79	1.3	0.51	1.41	2.36	1.21	103.42	25	LL	0.963	1.139	1.095	1.106	0.703	0.508	0.76	-0.6	0.3	-0.5	-0.3	-1.9	-2.1	0
A13	76	165	65	23.88	6.52	5.71	4.96	1.16	0.72	1.64	2.01	1.05	103.29	20	SS	0.886	0.901	1.004	1.044	0.963	0.611	0.598	-1.1	-1.6	-0.9	-0.4	-0.1	-1.8	-1.9
A11	77	172	65	21.97	8.67	6.75	4.43	1.25	0.76	1.91	2.26	1.3	97.56	19	SS	0.72	0.78	0.84	0.8	0.73	0.21	0.62	-1.7	-1.56	-1.58	-2.16	-1.07	-1.9	-1.25
A19	77	168	76	26.93	7.97	5.51	3.82	1.43	0.85	1.32	2.23	1.08	92.94	19	SS	1.091	1.159	1.236	1.262	0.718	0.699	0.761	0.6	0.6	1	1.4	-2	-1.2	-0.6
A27	77	165	65	23.88	6.43	6.45	4.58	0.91	0.92	1.44	2.25	1.01	92.82	14	SS	0.98	1.018	0.99	1.027	0.886	0.675	0.813	-0.3	-0.6	-1	-0.5	-0.7	-1.4	-0.1
A9	78	160	52	20.31	8.43	7.46	4	1.3	0.81	1.78	2.26	0.96	90.34	20	SS	0.935	0.945	1.066	1.092	0.764	0.645	0.682	-0.4	-1.2	-0.4	0	-1.6	-1.6	-1.2
A26	78	162	61	23.24	4.35	5.3	3.94	1.18	0.61	1.4	2.16	1.22	104.67	14	SS	0.75	0.78	0.81	0.86	0.73	0.28	0.53	-1.43	-1.55	-1.82	-1.72	-1.11	-2.22	-2.04
A18	79	161	64	24.69	10.24	6.74	4.17	1.41	0.76	1.63	2.48	1.03	101.45	20	SS	0.833	0.824	1.068	1.149	0.773	0.609	0.729	-1.6	-0.2	0.3	-0.8	-1.6	-1.8	-0.8
A30	79	165	56	20.57	4.89	4.54	5.13	0.82	0.61	1.58	2.36	0.99	109.43	20	SS	1.098	1.125	1.242	1.281	0.98	0.768	0.907	0.1	0.3	1.1	1.6	-0.1	-0.8	0.7
A31	80	160	60	23.44	10.54	7.72	3.7	1.17	0.62	1.39	2.22	1.02	91.48	21	SS	0.956	0.998	1.128	1.377	0.768	0.782	0.777	-0.5	-0.8	0.1	2.4	-1.6	-0.7	-0.4
A39	80	168	60	21.26	5.3	5.01	4.23	1.24	0.67	1.44	2.18	1.23	98.98	19	SS	0.799	0.792	0.842	0.882	0.937	1.022	0.803	-1.8	-2.4	-2.2	-1.7	-0.3	0.9	-0.2
A1	81	154	55	23.19	10.65	8.93	2.63	0.54	0.43	1.29	2.17	1.07	100.69	20	SS	1.438	1.46	1.389	1.532	0.827	0.913	0.83	3.5	3.1	2.3	3.7	-1.2	0.2	0
A14	82	168	65	23.03	6.67	5.33	3.68	0.94	0.68	1.09	1.96	1.21	98.27	24	LL	1.235	1.285	1.216	1.164	0.73	0.593	0.796	1.8	1.6	0.9	0.6	-1.9	-1.9	-0.3
A23	82	170	78	26.99	4.52	4.33	3.58	0.96	0.85	1.36	2.16	1.1	103.42	19	SS	0.916	0.96	0.932	1.058	0.878	0.871	0.747	-0.8	-1.1	-1.5	-0.3	-0.8	-0.1	-0.7
A6	84	157	70	28.4	7.88	6.37	5.11	1.24	0.49	1.33	2.07	1.31	95.63	22	SS	1.23	1.11	1.1	1.01	0.82	0.72	0.68	2.58	1.08	0.31	-0.71	-0.4	-0.46	-0.75
A25	84	170	52	17.99	4.05	4.2	3.68	0.85	0.93	1.58	2.4	0.97	88.27	21	SS	1.437	1.276	1.345	1.496	1.091	0.851	0.934	3.5	1.6	2	3.4	0.9	-0.2	0.9
A37	86	160	45	17.58	6.66	6.31	4.52	1.39	0.7	1.56	2.43	1.14	94.74	19	SS	1.108	1.276	1.281	1.344	0.759	0.817	0.683	0.8	1.6	1.4	2.1	-1.7	-0.4	-1.2
A24	87	170	71	24.57	5.78	5.75	4.3	1	0.83	1.66	2.13	1.03	88.72	20	SS	0.749	0.798	0.849	0.867	0.636	0.567	0.635	-2.2	-2.4	-2.2	-1.9	-2.4	-2.1	-1.6
A8	91	170	54	18.69	6.03	5.64	5.81	1.12	0.91	1.32	1.92	1.67	97.12	21	SS	0.886	0.861	0.955	1.081	0.693	0.489	0.616	-1.1	-1.9	-1.3	-0.1	-2.2	-2.4	-1.8
A5	92	165	58	21.3	8.44	7.77	4.9	1.24	0.73	1.26	2.49	1.89	75.54	21	SS	1.036	0.981	1.017	1.222	0.913	0.588	1.734	0.2	-0.9	-0.8	1.1	-0.5	-2	7.5

## Sheet: osteoporosis group
Number	Age	Height	Weight	BMI	Average blood glucose	Glycosylated hemoglobin	Total cholestero	Triglyceride	High-density lipoprotein	Low-density lipoprotein	Calcium	Phosphorus	Alkaline phosphatase	Number of repetition	Genotypes	BMD(L1)	BMD(L2)	BMD(L3)	BMD(L4)	BMD（Neck of femur）	BMD（wards triangle）	BMD（Greater trochanter of femur）	T-score(L1)	T-score(L2)	T-score(L3)	T-score(L4)	T-score（Neck of femur）	T-score（wards triangle）	T-score（Greater trochanter of femur）
B32	65	166	57	20.69	5.85	4.02	3.79	1.25	0.66	1.8	2.04	1.08	87.14	22	SS	0.637	0.757	0.616	0.702	0.691	0.5	0.56	-3.2	-2.8	-4.1	-3.2	-2.2	-2.5	-2.2
B22	67	164	65	24.17	11.12	7.42	5.95	1.28	0.76	1.1	2.19	1.45	103.01	17	SS	0.605	0.749	0.835	0.99	0.682	0.448	0.542	-3.4	-2.8	-2.3	-0.8	-2.3	-2.9	-2.4
B18	68	168	75	26.57	10.97	7.32	4.07	1.3	0.74	1.03	2.24	1.45	100.35	14	SS	0.695	0.672	0.747	0.992	0.828	0.645	0.666	-2.7	-3.5	-3	-1.4	-1.2	-1.6	-1.3
B20	68	160	65	25.39	8.28	5.53	4.11	1.35	0.79	1.97	2.24	1.16	98.12	18	SS	0.663	0.776	0.959	1.051	0.569	0.427	0.66	-2.9	-2.6	-1.3	-0.3	-3.1	-3	-1.4
B2	70	173	65	21.72	10.4	8.23	6.2	1.25	0.78	1.93	2.32	1.3	97.41	22	SS	0.685	0.772	0.719	0.782	0.795	0.618	0.675	-2.8	-2.6	-3.3	-2.6	-1.4	-1.8	-1.3
B16	70	161	59	22.76	7.05	5.56	4.67	1.52	1.02	1.13	2.18	1.1	109.28	26	LL	1.024	0.993	1.014	1.083	0.678	0.515	0.377	0.1	-0.8	-0.8	-0.1	-2.3	-2.4	-3.8
B21	70	150	58	25.78	9.76	6.73	5.21	1.56	0.72	1.51	2.16	1.2	97.92	24	LL	0.584	0.878	0.676	0.556	0.478	0.403	0.523	-3.6	-1.7	-3.6	-4.4	-3.8	-3.2	-2.5
B28	71	141	42	21.13	6.47	5.06	7.97	1.73	0.88	2.08	2.29	1.24	96.03	17	SS	0.661	0.684	0.763	0.817	0.78	0.704	0.772	-2.8	-2.7	-2.4	-1.8	-1.5	-1.2	-0.9
B31	72	165	67	24.61	11.33	9.13	6.74	1.35	0.91	1	2.11	1.15	105.41	21	SS	0.727	0.873	1.04	1.058	0.598	0.509	0.462	-2.4	-1.8	-0.6	-0.3	-2.9	-2.5	-3
B4	73	164	64	23.8	5.65	3.91	4.54	1.31	1	1.12	2.1	1.22	96.6	21	SS	0.879	0.617	0.71	0.78	0.562	0.419	0.615	-1.1	-3.9	-3.3	-2.6	-3.2	-3.1	-1.8
B6	73	170	55	19.03	8.63	7.04	8.01	1.39	0.83	1.5	2.05	0.78	106.1	21	SS	0.83	0.847	0.731	0.787	0.45	0.662	0.581	-1.9	-2	-3.2	-2.5	-4.1	-1.5	-2.1
B23	73	170	64	22.15	6.7	5.19	4.31	1.58	0.68	1.98	2.11	1.11	88.52	23	LL	0.746	0.851	0.746	0.795	0.607	0.488	0.587	-2.3	-2	-3	-2.5	-2.9	-2.6	-2
B24	73	150	55	24.44	8.95	6.46	3.53	0.67	0.71	2.15	2.09	0.93	97.88	18	SS	1.04	0.724	0.725	0.68	0.567	0.442	0.502	0.2	-3	-3.2	-3.4	-3.2	-2.9	-2.7
B29	73	165	71	26.08	7.35	6.14	3.98	1.35	0.76	1.87	1.83	1.27	100.27	18	SS	0.785	0.815	0.809	0.769	0.669	0.504	0.709	-1.9	-2.3	-2.5	-2.7	-2.4	-2.5	-1
B10	74	160	65	25.39	12	11.7	4.35	1.44	0.82	1.04	2.37	1.08	89.56	21	SS	0.775	0.918	1.021	0.819	0.808	0.623	0.897	-2.5	-2.6	-1.6	-0.6	-1.3	-1.7	-1.3
B34	74	165	50	18.37	10.54	7.62	6.68	1.1	0.89	1.1	2.25	1.13	91.8	23	LL	0.52	0.6	0.62	0.7	0.69	0.3	0.51	-3.33	-2.99	-3.21	-2.87	-1.4	-3.1	-2.24
B35	74	166	52	18.87	10.43	10.41	5.67	1.35	0.9	1.09	1.95	1.3	100.07	19	SS	0.654	0.629	0.692	0.654	0.481	0.365	0.462	-3	-3.8	-3.5	-2	-3.8	-3.4	-3.1
B38	75	163	47	17.69	6.07	5.21	4.53	1.43	0.95	2.15	2.27	1.23	93.32	25	LL	0.879	0.617	0.71	0.78	0.562	0.419	0.615	-1.1	-3.9	-3.3	-2.6	-3.2	-3.1	-1.8
B39	75	160	55	21.48	6.37	5.41	5.17	1	1.12	0.92	2.1	1.18	97.52	26	LL	0.907	0.832	0.964	0.941	0.708	0.494	0.702	-0.9	-2.1	-1.2	-1.2	-2.1	-2.6	-1
B7	76	160	38	14.84	10.14	10.23	6.3	0.57	0.76	1.69	2.44	1.29	97.92	24	LL	0.981	0.944	1.025	1.066	0.783	0.617	0.689	-0.3	-1.2	-0.7	-0.2	-1.5	-2.8	-1.2
B14	76	168	61	21.61	7.83	6.04	8.87	1.26	0.81	1.46	2.22	1.02	90.52	22	SS	0.75	0.71	0.75	0.73	0.61	0.14	0.52	-1.46	-2.11	-2.23	-2.61	-2.01	-4.14	-2.12
B37	76	172	60	20.28	8.27	6.9	3.32	0.54	0.62	2.16	2.28	1.29	97.92	23	LL	0.978	1.154	1.252	1.273	0.708	0.66	0.778	-0.3	0.5	1.2	1.5	-2.5	-1.5	-0.4
B19	78	165	42	15.43	7.48	6.09	3.21	0.55	0.62	1.04	2.09	1.33	112.97	21	SS	0.87	0.956	0.848	0.823	0.932	1.181	0.564	-1.2	-1.1	-2.2	-2.2	-0.4	2	-2.2
B11	80	160	65	25.39	13.18	7.33	7.07	1.32	0.77	1.8	2.56	1.08	95.42	26	LL	0.66	0.66	0.764	0.825	0.627	0.476	0.522	-3.6	-3.6	-2.9	-2.2	-2.7	-2.7	-2.6
B12	80	145	30	14.27	7.7	5.81	7.47	1.35	0.82	1.68	2.12	1.35	103.99	23	LL	0.665	0.693	0.769	0.761	0.6	0.465	0.596	-3	-3.3	-2.8	-2.7	-2.9	-2.8	-1.9
B25	80	170	68	23.53	6.68	5.16	6.28	1.4	0.69	2.05	2.63	1.26	99.41	21	SS	0.574	0.633	0.639	0.731	0.504	0.374	0.459	-3.7	-3.8	-3.9	-3	-3.6	-3.4	-3.1
B8	81	158	50	20.03	8.99	6.21	4.08	1.25	0.91	1.92	2.28	1.13	104.23	20	SS	0.54	0.6	0.6	0.64	0.43	0.1	0.48	-3.17	-2.99	-3.31	-3.24	-3.4	-4.35	-2.51
B9	82	160	56	21.88	11.63	8.29	3.82	1.23	0.71	1.88	2.41	1.29	94.49	27	LL	0.68	0.74	0.69	0.65	0.56	0.19	0.51	-2	-1.89	-2.68	-3.2	-2.4	-3.89	-2.2
B15	82	160	56	21.88	7.23	6.54	3.16	0.39	0.89	1.88	2.21	1.05	94.11	23	LL	0.572	0.624	0.659	0.671	0.619	0.384	0.617	-3.7	-3.9	-3.8	-3.5	-2.8	-3.3	-1.8
B17	82	162	52	19.81	8.36	7.13	5.77	1.19	0.63	1.85	1.94	1.2	87.8	23	LL	0.5	0.53	0.56	0.65	0.65	0.19	0.46	-3.52	-3.52	-3.62	-3.22	-1.67	-3.79	-2.65
B26	82	165	62	22.77	6.89	5.87	6.77	1.43	0.86	0.76	2.1	1.06	107.02	19	SS	0.894	1.021	1.052	1.099	0.882	0.818	0.776	-1	-2.6	-0.5	0.1	-1.2	-0.4	-0.4
B1	83	162	46	17.53	10.03	10.83	5.59	1.37	0.71	2	2.31	1.1	97.92	18	SS	0.876	0.895	0.776	0.723	0.774	0.748	0.715	-1.2	-1.6	-2.8	-3.1	-1.8	-0.9	-0.9
B33	84	154	54	22.77	7.43	5.51	3.36	1.15	0.57	1.64	2.32	1.32	99.22	24	LL	0.856	0.712	0.706	0.653	0.755	0.701	0.627	-1.3	-3.1	-3.4	-3.6	-1.7	-1.2	-1.7
B36	84	167	42	15.06	10.38	7.21	4.22	1.58	0.72	1.92	2.34	1.26	96.34	26	LL	0.706	0.757	0.85	0.802	0.694	0.447	0.657	-2.6	-2.8	-2.2	-2.4	-2.2	-2.9	-1.4
B27	85	170	65	22.49	8.09	7.08	5.52	1.54	0.95	1.81	2.5	1.3	107.03	18	SS	0.714	0.711	0.686	0.761	0.617	0.569	0.74	-2.5	-3.1	-3.5	-2.7	-2.8	-2.1	-0.7
B30	85	168	63	22.32	4.98	5.34	4.86	1.72	1.04	2.1	1.94	1.03	97.92	18	SS	0.749	0.798	0.849	0.867	0.636	0.567	0.635	-2.2	-2.4	-2.2	-1.9	-2.6	-2.1	-1.6
B13	86	160	66	25.78	7.79	6.25	4.28	1.29	0.8	1.78	2.05	1.22	89.37	25	LL	0.796	0.764	0.763	0.858	0.518	0.534	0.655	-1.8	-2.7	-2.9	-1.9	-3.5	-2.3	-1.4
B5	87	162	53	20.2	11.47	9.76	3.78	1.27	0.7	1.81	1.96	1.14	97.92	25	LL	0.82	0.85	0.84	0.82	0.54	0.27	0.46	-0.91	-1.03	-1.56	-1.98	-2.56	-3.28	-2.71
B3	90	165	43	15.79	12.03	8.4	4.28	1.48	0.86	2.12	2.07	1.1	95.94	25	LL	0.72	0.779	0.789	0.81	0.661	0.703	0.655	-2.5	-2.6	-2.7	-2.3	-2.4	-1.2	-1.4
B40	91	152	38	16.45	10.9	7.92	4.85	1.3	0.85	1.54	2.09	1.23	93.23	23	LL	0.96	1.027	1.044	1.157	0.711	0.507	0.581	-0.5	-0.5	-0.6	0.6	-2.1	-2.5	-2.1
